# Supplementary material for: Removal of total chromium in wastewater via simultaneous photocatalysis and adsorption using calcium silicate hydrate-based composites
Source: Royal Society of Chemistry journal article supplement (doi:10.1039/d3ta05384a), 2023-01-01
Supplement: d3ta05384a1.pdf [file d3ta05384a1.pdf]

## Supporting Information

# **Remove Total Chromium in Wastewater via Simultaneous Photocatalysis and Adsorption by Using Calcium Silicate Hydrates-Based Composite**

Min Liu, <sup>a, #</sup> Qi Liu, <sup>b, #</sup> Xue-Ting Jin, <sup>a</sup> Ya-Chen Zou, Di-Ning Li, <sup>a</sup> Pan Feng, <sup>b, \*</sup> and Yang-Hui Luo <sup>a, \*</sup>

<sup>a</sup> *School of Chemistry and Chemical Engineering, Southeast University, Nanjing, 211189, P.R. China*

<sup>b</sup> *Jiangsu Key Laboratory of Construction Materials, School of Materials Science and Engineering, Southeast University, Nanjing 211189, China*

\*E-mail: pan.feng@seu.edu.cn (P. Feng); luoyh2016@seu.edu.cn (Y.-H. Luo)

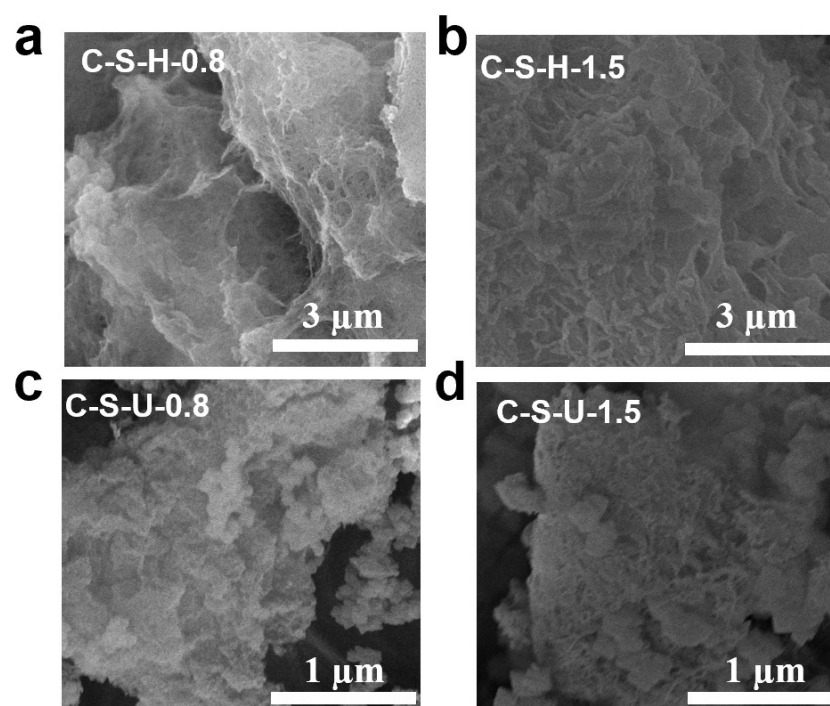

**Fig. S1** SEM images of (a) C-S-H-0.8, (b) C-S-H-1.5, (c) C-S-U-0.8 and (d) C-S-U-1.5.

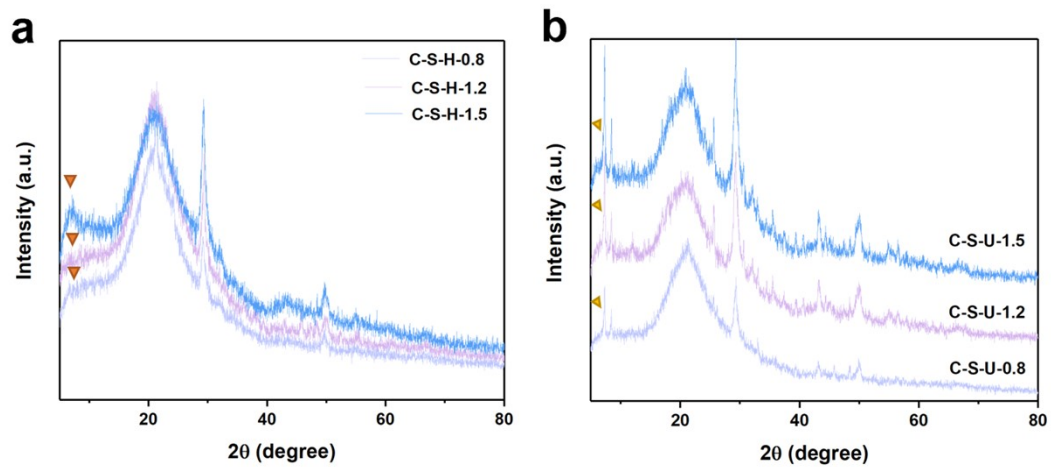

**Fig. S2** XRD patterns of (a) C-S-H and (b) C-S-U with different Ca/Si.

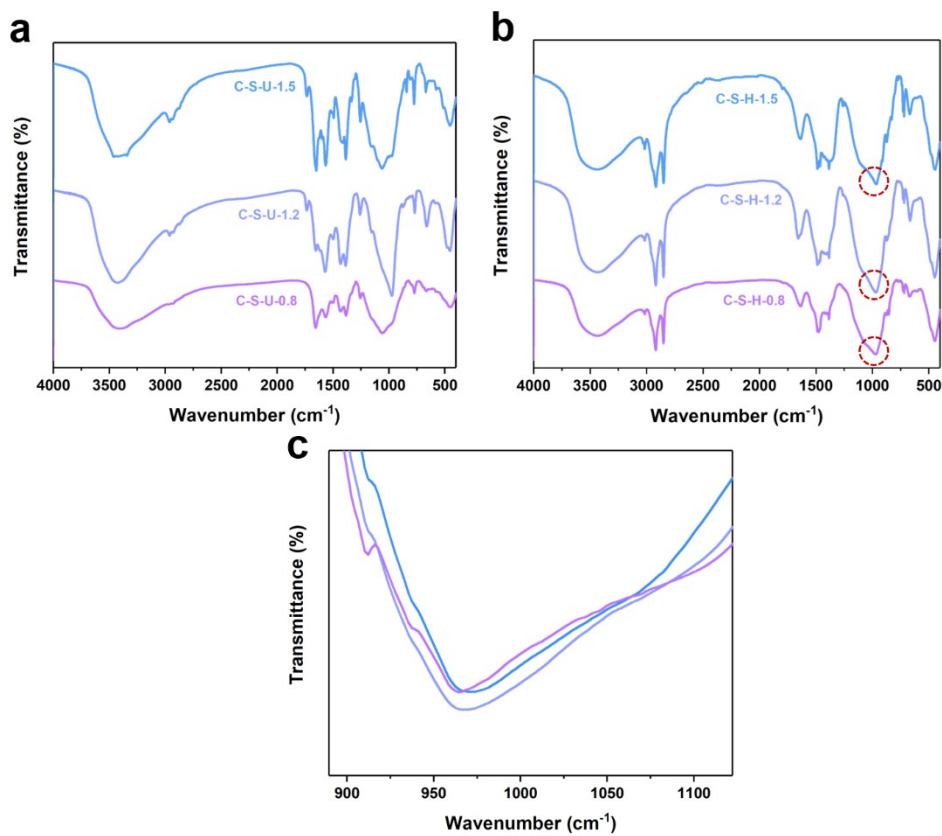

**Fig. S3** FTIR spectra of (a) C-S-H and (b) C-S-U with different Ca/Si. The partial magnification of FTIR spectra for C-S-H at 960 cm<sup>-1</sup>.

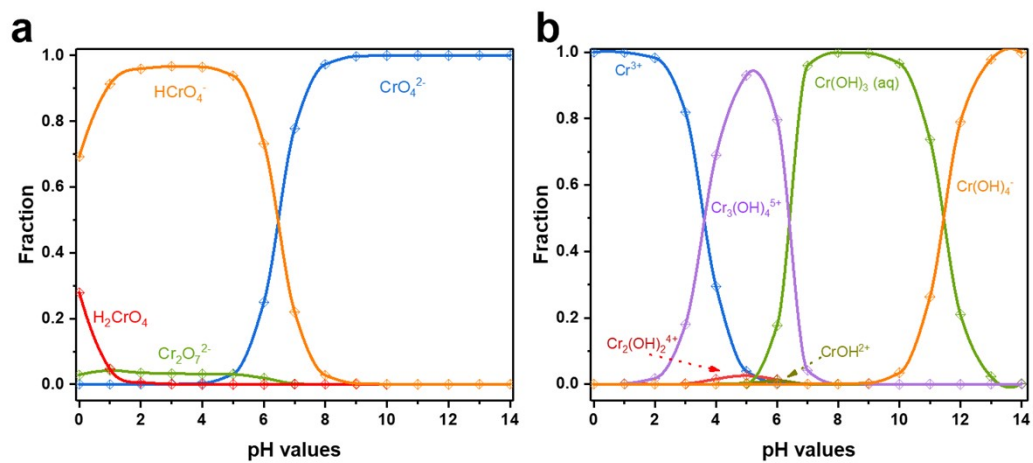

**Fig. S4** Species distribution of (a) Cr(VI) and (b) Cr(III) under different pH solutions.

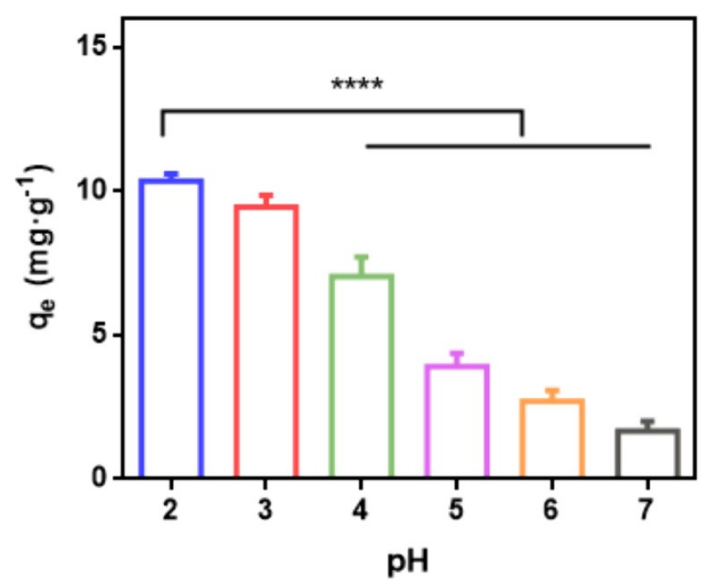

**Fig. S5** The influences of pH values for adsorption capacity on C-S-U-1.2 towards Cr(VI).

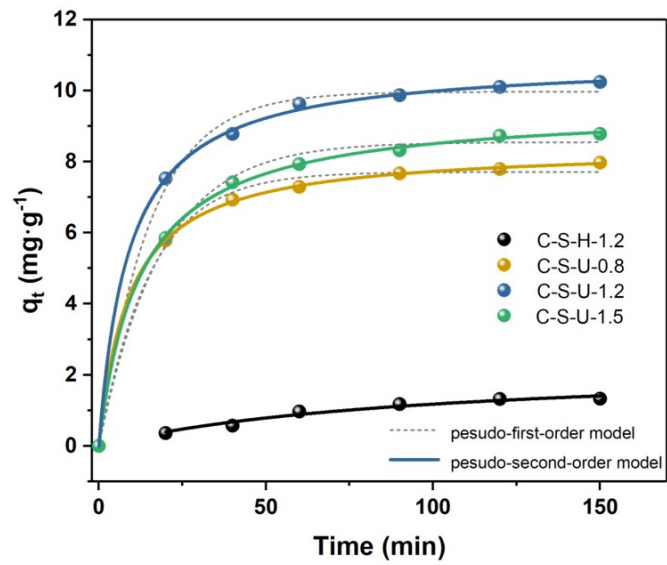

**Fig. S6** The adsorption kinetics of Cr(VI) on C-S-H-1.2 and C-S-U (with different Ca/Si).

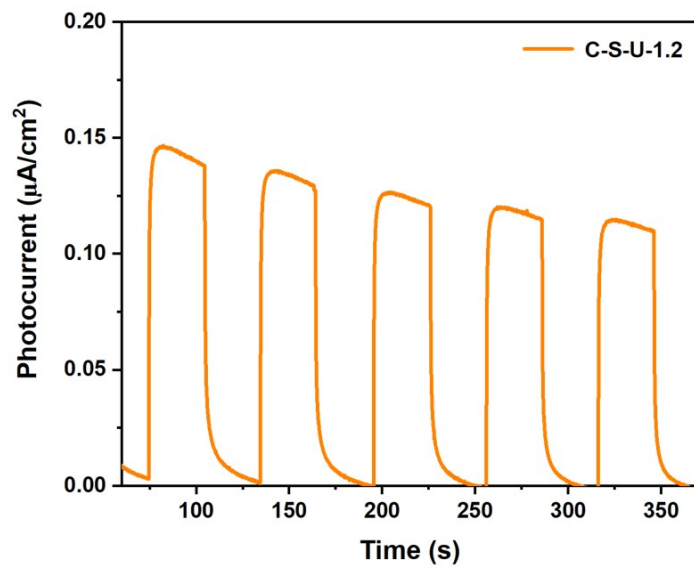

**Fig. S7** The photocurrent response of C-S-U-1.2.



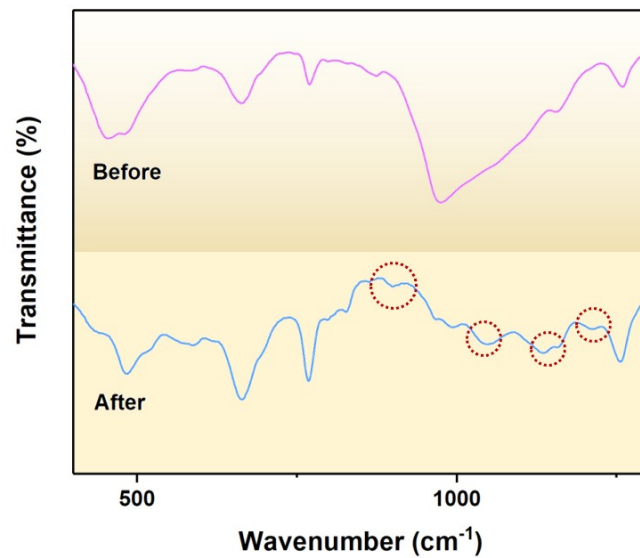

**Fig. S8** The FT-IR spectra of C-S-U-1.2 before and after Cr(III) adsorption.

**Table S1.** Isotherms parameters for adsorption of Cr(III) by C-S-H and C-S-U.

| Adsorption isotherms models | Parameters                            | Absorbents |           |
|-----------------------------|---------------------------------------|------------|-----------|
|                             |                                       | C-S-H-1.2  | C-S-U-1.2 |
| Langmuir model              | $q_{\max}$ (mg/g)                     | 185.375    | 217.918   |
|                             | $b$ (L/mg)                            | 0.0349     | 0.03228   |
|                             | $R_1^2$                               | 0.9924     | 0.9981    |
|                             | $K_F$ ((mg/g)·(L/mg) <sup>1/n</sup> ) | 20.035     | 21.837    |
| Freundlich model            | $n$                                   | 2.299      | 2.230     |
|                             | $R_2^2$                               | 0.9748     | 0.9768    |

**Table S2.** Summary of photocatalytic performance of MOFs and MOFs-based composites for Cr(VI) in water.

| Materials                               | Conditions                               | Time | Reduction efficiency (%) | Ref. |
|-----------------------------------------|------------------------------------------|------|--------------------------|------|
| NH <sub>2</sub> -MIL-125                | [Cr(VI)]=48 mg/L, [Mats]=0.5 g/L, pH 2.1 | 60   | 97                       | 1    |
| NH <sub>2</sub> -MIL-88B                | [Cr(VI)]= 8 mg/L, [Mats]=0.5 g/L, pH 2   | 45   | 100                      | 2    |
| UiO-66-NH <sub>2</sub>                  | [Cr(VI)]=10 mg/L, [Mats]=0.5 g/L, pH 2   | 80   | 97                       | 3    |
| MIL-68- NH <sub>2</sub>                 | [Cr(VI)]=20 mg/L, [Mats]=1 g/L, pH 6     | 180  | 97                       | 4    |
| MIL-53                                  | [Cr(VI)]=20 mg/L, [Mats]=1 g/L, pH 4     | 40   | 100                      | 5    |
| MIL-101                                 | [Cr(VI)]= 8 mg/L, [Mats]=0.5 g/L, pH 2   | 60   | 100                      | 2    |
| g-C <sub>3</sub> N <sub>4</sub> /MIL-53 | [Cr(VI)]=10 mg/L, [Mats]=0.4 g/L, pH 2-3 | 180  | 100                      | 6    |
| MIL-100                                 | [Cr(VI)]=20 mg/L, [Mats]=1 g/L, pH 4     | 24   | 100                      | 7    |
| This work                               | [Cr(VI)]=20 mg/L, [Mats]=0.4 g/L, pH 2   | 60   | 100                      | /    |

**Table S3.** Summary of adsorption ability of MOFs and MOFs-based composites for Cr(VI) and Cr(III) in water.

| Materials | Conditions | q <sub>max</sub> (mg/g) | Ref. |
|-----------|------------|-------------------------|------|
|-----------|------------|-------------------------|------|

|                        |                                               | Cr(III) | Cr(VI) |    |
|------------------------|-----------------------------------------------|---------|--------|----|
| ZIF-67                 | [Cr(VI)]=6-15 mg/L, [Mats]=1 g/L, natural pH  | /       | 15.43  | 8  |
| UiO-66-NH <sub>2</sub> | [Cr(VI)]=5 mg/L, [Mats]=1 g/L, pH 6.5         | /       | 32.36  | 9  |
| ZIF-8                  | [Cr(VI)]=2.5 mg/L, [Mats]=20 g/L, pH 7        | /       | 0.15   | 10 |
| MOF-867                | [Cr(VI)]=50 mg/L, [Mats]=0.5 g/L              | /       | 53.4   | 11 |
| TMU-6                  | [Cr(III)]=0.1 mg/L, [Mats]=7 mg/30mL, pH 10   | 118     | /      | 12 |
| TMU-5                  | [Cr(VI)]=0.1 mg/L, [Mats]=7 mg/30mL, pH 10    | 123     | /      | 12 |
| This work              | [Cr(VI)]=10-20 mg/L, [Mats]=0.2-0.4 g/L, pH 2 | 217.9   | 11.23  | /  |

## Reference:

1. H. Wang, X. Yuan, Y. Wu, G. Zeng, X. Chen, L. Leng, Z. Wu, L. Jiang, H. Li, *J. Hazard. Mater.* 2015, **286**, 187-194.

2. L. Shi, T. Wang, H. Zhang, K. Chang, X. Meng, H. Liu, J. Ye, *Adv. Sci.* 2015, **2**, 1500006.
3. L. Shen, S. Liang, W. Wu, R. Liang, L. Wu, *Dalton Trans.* 2013, **42**, 13649-13657.
4. R. Liang, L. Shen, F. Jing, W. Wu, N. Qin, R. Lin, L. Wu, *Appl. Catal. B: Environ.* 2015, **162**, 245-251.
5. R. Liang, F. Jing, L. Shen, N. Qin, L. Wu, *J. Hazard. Mater.* 2015, **287**, 364-372.
6. W. Huang, N. Liu, X. Zhang, M. Wu, L. Tang, *Appl. Surf. Sci.* 2017, **425**, 107-116.
7. R. Liang, F. Jing, L. Shen, N. Qin, L. Wu, *Nano Res.* 2015, **8**, 3237-3249.
8. X. Li, X. Gao, L. Ai, J. Jiang, *Chem. Eng. J.* 2015, **274**, 238-246.
9. S. Wu, Y. Ge, Y. Wang, X. Chen, F. Li, H. Xuan, X. Li, *Environ. Technol.* 2017, **39**, 1937-1948.
10. M.D. Ogden, E.M. Moon, A. Wilson, S.E. Pepper, *Chem. Eng. J.* 2017, **317**, 80-89.
11. Q. Zhang, J. Yu, J. Cai, L. Zhang, Y. Cui, Y. Yang, B. Chen, G. Qian, *Chem. Commun.* 2015, **51**, 14732-14734.
12. E. Tahmasebi, M.Y. Masoomi, Y. Yamini, A. Morsali, *Inorg. Chem.* 2015, **54**, 425-433.
